# Supplementary material for: A convenient solid-phase strategy for the synthesis of antimicrobial cyclic lipopeptides
Source: Royal Society of Chemistry journal article supplement (doi:10.1039/c3ob40319j), 2013-01-01

## Supporting Information

### A convenient solid-phase strategy for the synthesis of antimicrobial cyclic lipopeptides

Sílvia Vilà, Esther Badosa, Emilio Montesinos, Lidia Feliu,\* and Marta Planas\*

lidia.feliu@udg.edu, marta.planas@udg.edu

#### Table of contents

|                                                                                                          |    |
|----------------------------------------------------------------------------------------------------------|----|
| Fmoc-Lys-Phe-Lys-Lys-Leu-Gln-OAll .....                                                                  | 2  |
| Fmoc-Lys-Lys-Leu-Lys-Lys-Phe-Lys-Lys-Leu-Gln-OAll .....                                                  | 3  |
| Fmoc-Lys-Lys-Leu-Lys-Lys(ivDde)-Phe-Lys-Lys-Leu-Gln-OAll.....                                            | 4  |
| Fmoc-Lys(COCH <sub>3</sub> )-Phe-Lys-Lys-Leu-Gln-OAll ( <b>7a</b> ).....                                 | 5  |
| Fmoc-Lys(COC <sub>3</sub> H <sub>7</sub> )-Phe-Lys-Lys-Leu-Gln-OAll ( <b>7b</b> ) .....                  | 6  |
| Fmoc-Lys(COC <sub>7</sub> H <sub>15</sub> )-Phe-Lys-Lys-Leu-Gln-OAll ( <b>7c</b> ) .....                 | 7  |
| Fmoc-Lys-Lys-Leu-Lys-Lys(COCH <sub>3</sub> )-Phe-Lys-Lys-Leu-Gln-OAll ( <b>11a</b> ) .....               | 8  |
| Fmoc-Lys-Lys-Leu-Lys-Lys(COC <sub>3</sub> H <sub>7</sub> )-Phe-Lys-Lys-Leu-Gln-OAll ( <b>11b</b> ) ..... | 9  |
| Fmoc-Lys-Lys-Leu-Lys-Lys(COC <sub>7</sub> H <sub>15</sub> )-Phe-Lys-Lys-Leu-Gln-OAll ( <b>11c</b> )..... | 10 |
| c(Lys-Lys-Leu-Lys-Lys-Phe-Lys-Lys-Leu-Gln) ( <b>BPC194</b> ) .....                                       | 11 |
| c(Lys-Lys-Leu-Lys-Lys(ivDde)-Phe-Lys-Lys-Leu-Gln).....                                                   | 11 |
| c(Lys-Lys-Leu-Lys-Lys(COCH <sub>3</sub> )-Phe-Lys-Lys-Leu-Gln) ( <b>5</b> ).....                         | 11 |
| c(Lys-Lys-Leu-Lys-Lys(COC <sub>7</sub> H <sub>15</sub> )-Phe-Lys-Lys-Leu-Gln) ( <b>BPC498</b> ).....     | 12 |
| c(Lys-Lys-Leu-Lys-Lys(COC <sub>4</sub> H <sub>7</sub> )-Phe-Lys-Lys-Leu-Gln) ( <b>BPC500</b> ) .....     | 14 |
| c(Lys-Lys-Leu-Lys-Lys(COC <sub>15</sub> H <sub>31</sub> )-Phe-Lys-Lys-Leu-Gln) ( <b>BPC502</b> ) .....   | 16 |
| c(Lys-Lys-Leu-Lys-Lys(COC <sub>11</sub> H <sub>22</sub> OH)-Phe-Lys-Lys-Leu-Gln) ( <b>BPC524</b> ) ..... | 18 |
| c(Lys-Lys-Leu-Lys-Lys(COC <sub>11</sub> H <sub>23</sub> )-Phe-Lys-Lys-Leu-Gln) ( <b>BPC530</b> ) .....   | 20 |

## Fmoc-Lys-Phe-Lys-Lys-Leu-Gln-OAll

ESI-MS (m/z)

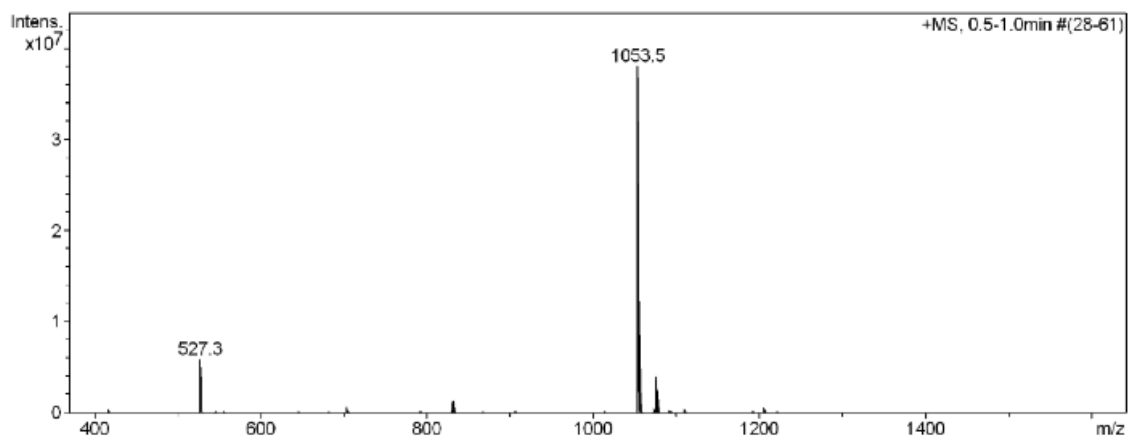

HPLC ( $\lambda=220$  nm)

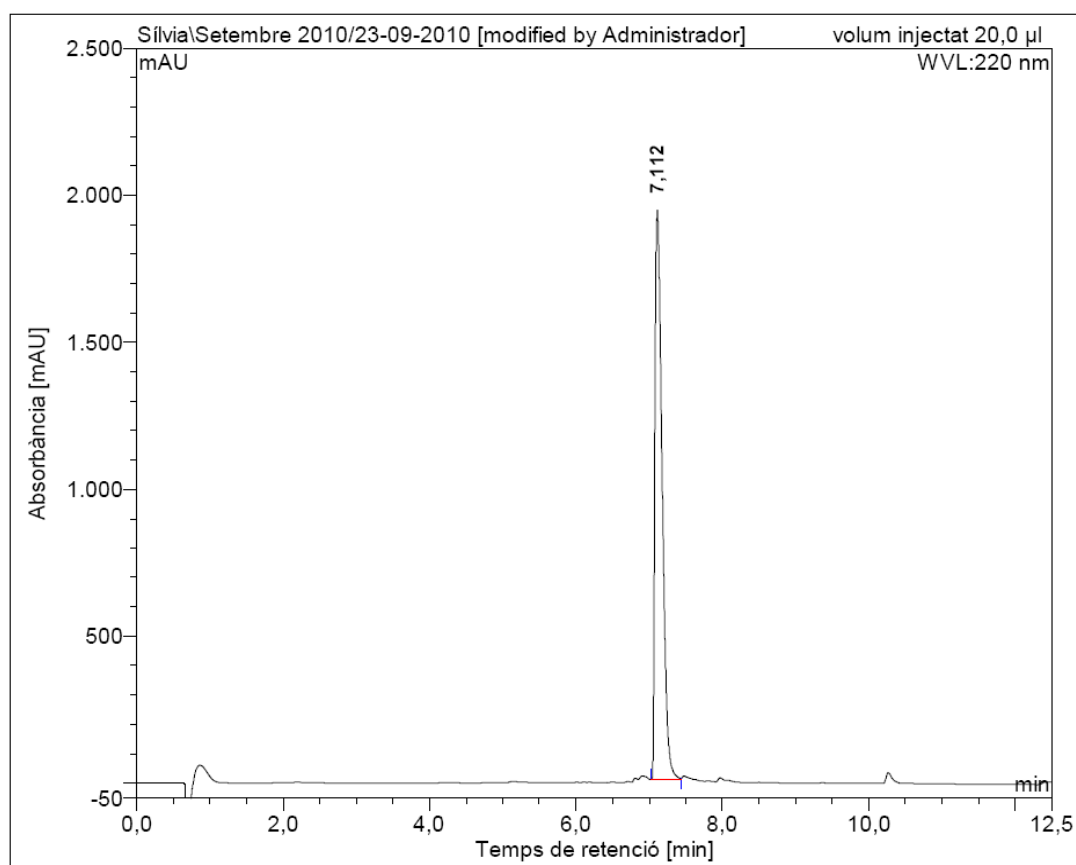

| No.    | mps retenc<br>min | alçada<br>mAU | Area<br>mAU*min | Area relativa<br>% |
|--------|-------------------|---------------|-----------------|--------------------|
| 1      | 7,11              | 1937,784      | 223,207         | 100,00             |
| Total: |                   | 1937,784      | 223,207         | 100,00             |

## Fmoc-Lys-Lys-Leu-Lys-Lys-Phe-Lys-Lys-Leu-Gln-OAll

ESI-MS (m/z)

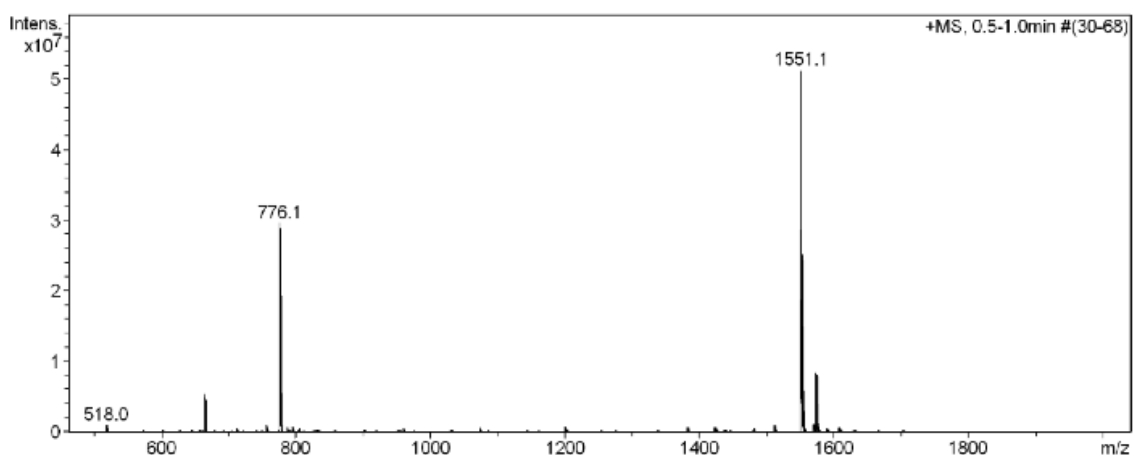

HPLC ( $\lambda=220$  nm)

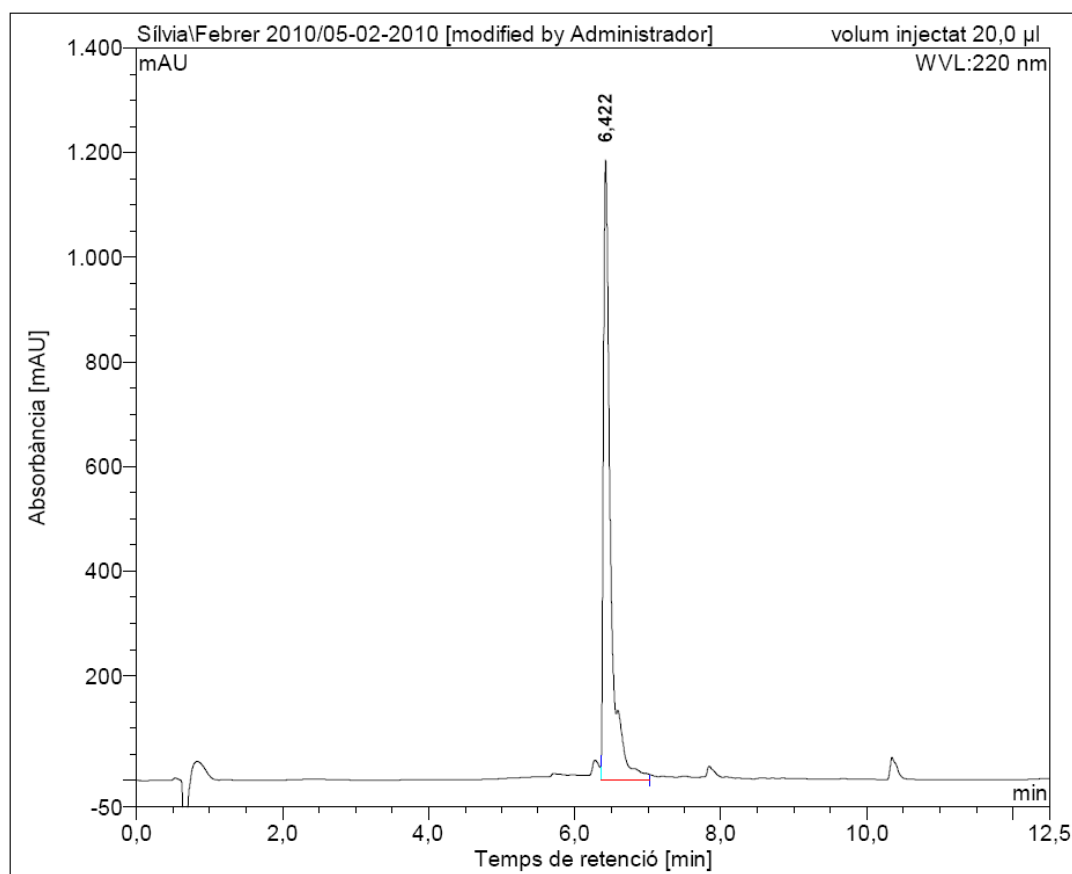

| No.    | mps retenc<br>min | alçada<br>mAU | Area<br>mAU*min | Area relativa<br>% |
|--------|-------------------|---------------|-----------------|--------------------|
| 1      | 6,42              | 1186,004      | 134,786         | 100,00             |
| Total: |                   | 1186,004      | 134,786         | 100,00             |

## Fmoc-Lys-Lys-Leu-Lys-Lys(ivDde)-Phe-Lys-Lys-Leu-Gln-OAll

ESI-MS (m/z)

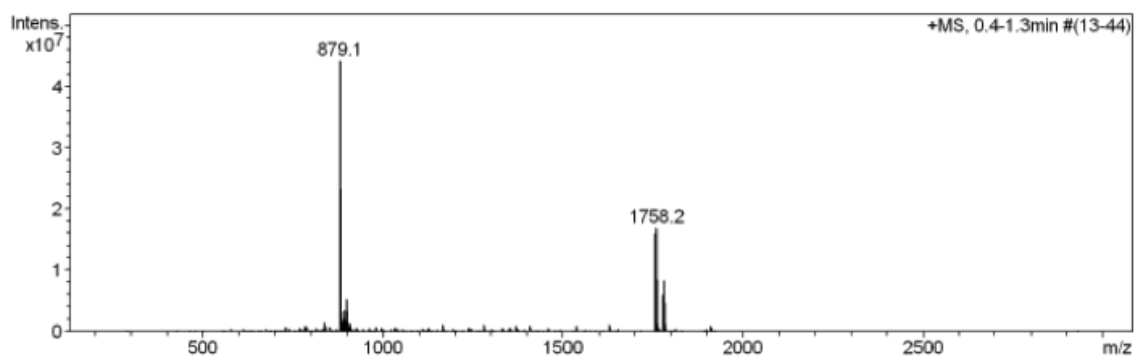

HPLC ( $\lambda=220$  nm)

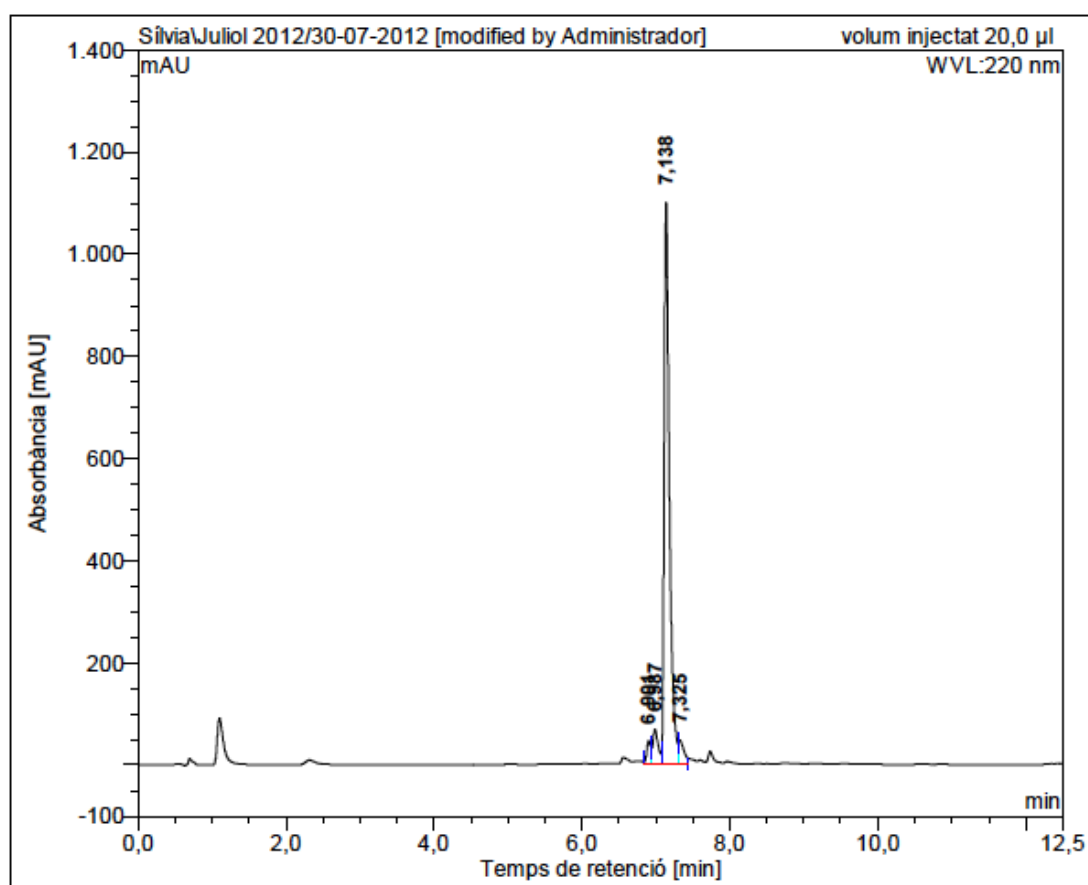

| No.    | mps retenc min | alçada mAU | Area mAU*min | Area relativa % |
|--------|----------------|------------|--------------|-----------------|
| 1      | 6,90           | 44,489     | 2,715        | 2,67            |
| 2      | 6,99           | 66,646     | 5,448        | 5,36            |
| 3      | 7,14           | 1098,328   | 89,672       | 88,22           |
| 4      | 7,33           | 45,526     | 3,814        | 3,75            |
| Total: |                | 1254,990   | 101,650      | 100,00          |

## Fmoc-Lys(COCH<sub>3</sub>)-Phe-Lys-Lys-Leu-Gln-OAll (7a)

ESI/MS (m/z)

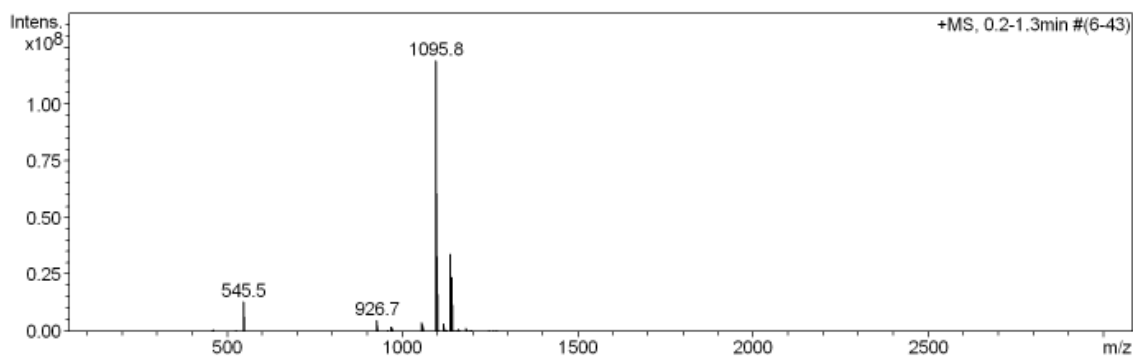

HPLC (220 nm)

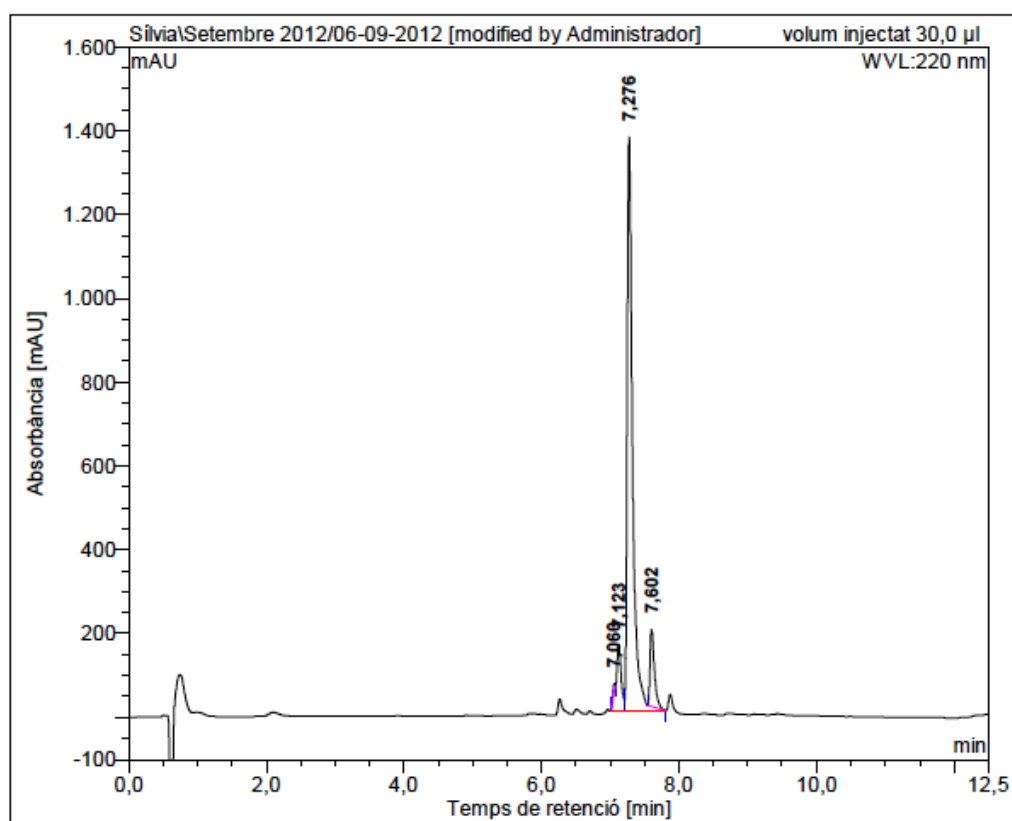

| No.    | mps retenc<br>min | alçada<br>mAU | Area<br>mAU*min | Area relativa<br>% |
|--------|-------------------|---------------|-----------------|--------------------|
| 1      | 7,06              | 18,357        | 0,710           | 0,46               |
| 2      | 7,12              | 158,498       | 13,821          | 8,98               |
| 3      | 7,28              | 1370,242      | 125,530         | 81,53              |
| 4      | 7,60              | 183,745       | 13,901          | 9,03               |
| Total: |                   | 1730,842      | 153,963         | 100,00             |

## Fmoc-Lys(COC<sub>3</sub>H<sub>7</sub>)-Phe-Lys-Lys-Leu-Gln-OAll (7b)

ESI-MS (m/z)

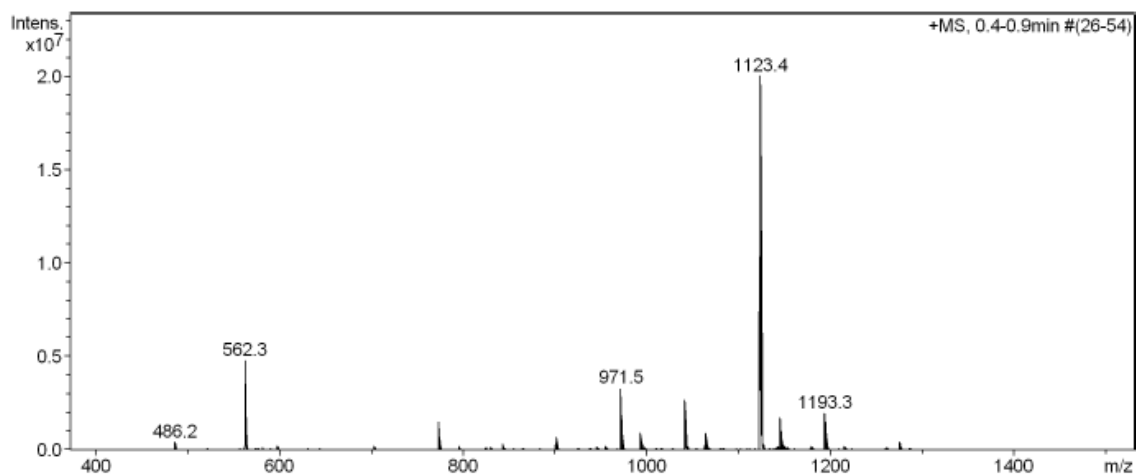

HPLC (220 nm)

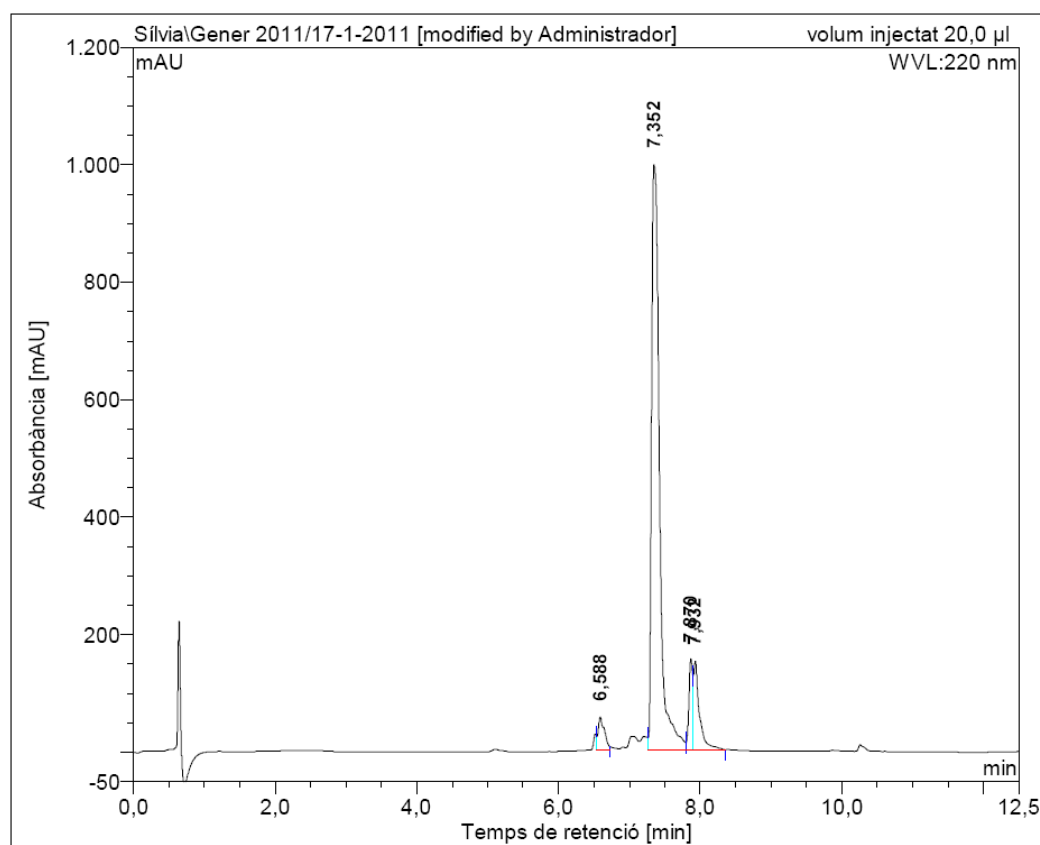

| No.    | mps retenc<br>min | alçada<br>mAU | Area<br>mAU*min | Area relativa<br>% |
|--------|-------------------|---------------|-----------------|--------------------|
| 1      | 6,59              | 55,359        | 5,548           | 3,49               |
| 2      | 7,35              | 995,032       | 129,227         | 81,27              |
| 3      | 7,87              | 154,356       | 9,479           | 5,96               |
| 4      | 7,93              | 151,154       | 14,759          | 9,28               |
| Total: |                   | 1355,902      | 159,013         | 100,00             |

## Fmoc-Lys(COC<sub>7</sub>H<sub>15</sub>)-Phe-Lys-Lys-Leu-Gln-OAll (7c)

ESI-MS (m/z)

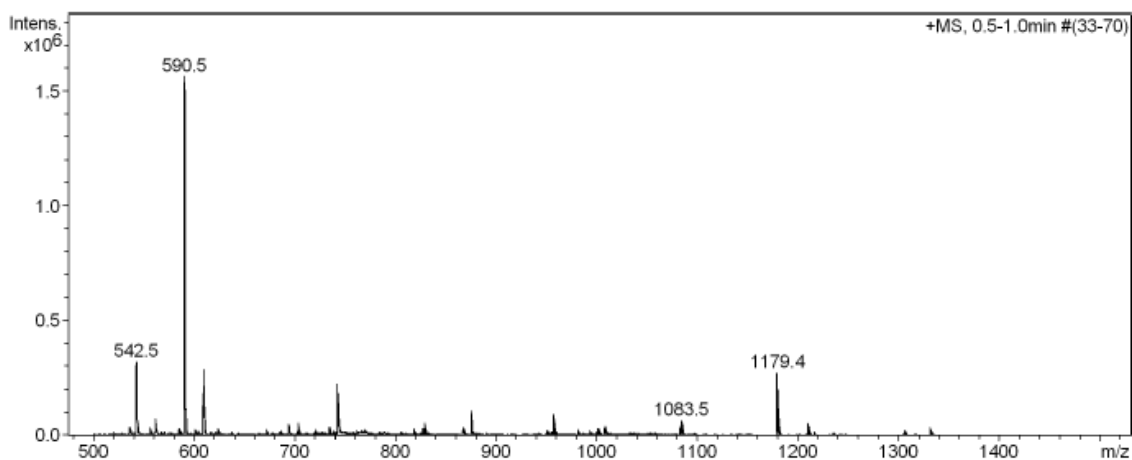

HPLC (220 nm)

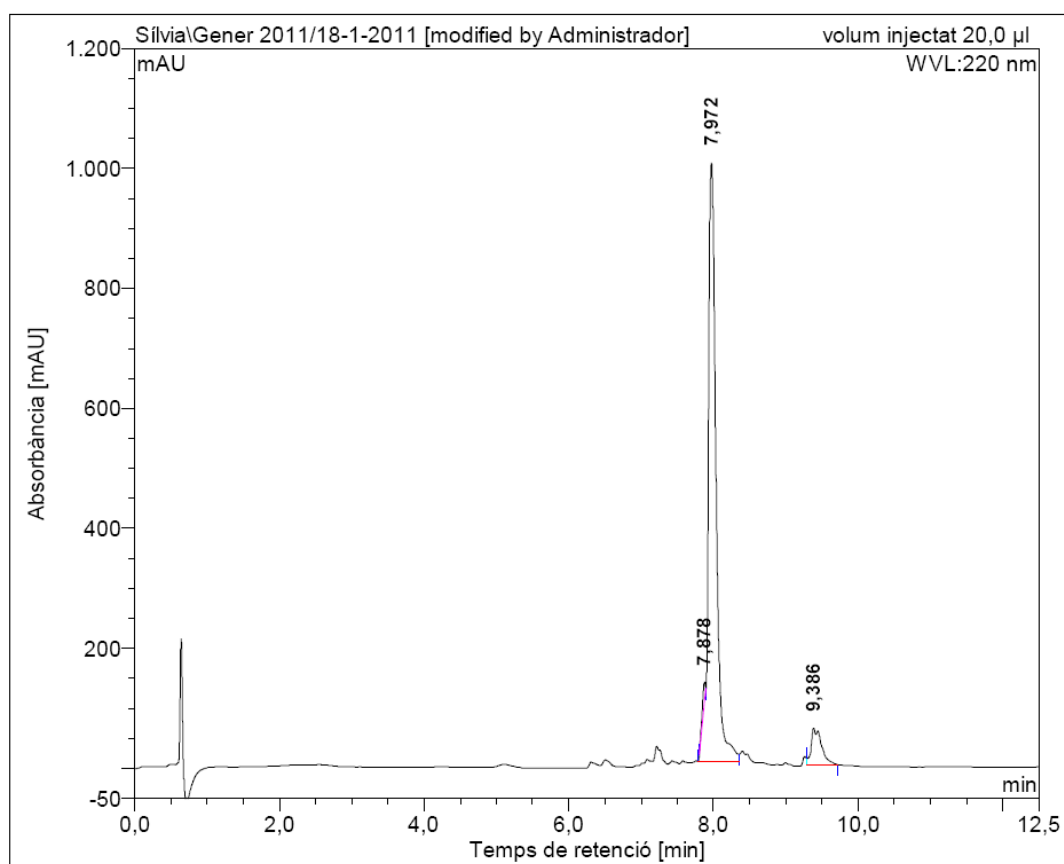

| No.    | mps retenc min | alçada mAU | Area mAU*min | Area relativa % |
|--------|----------------|------------|--------------|-----------------|
| 1      | 7,88           | 32,686     | 1,856        | 1,35            |
| 2      | 7,97           | 997,695    | 125,644      | 91,39           |
| 3      | 9,39           | 60,975     | 9,975        | 7,26            |
| Total: |                | 1091,356   | 137,476      | 100,00          |

## Fmoc-Lys-Lys-Leu-Lys-Lys(COCH<sub>3</sub>)-Phe-Lys-Lys-Leu-Gln-OAlI (11a)

ESI/MS (m/z)

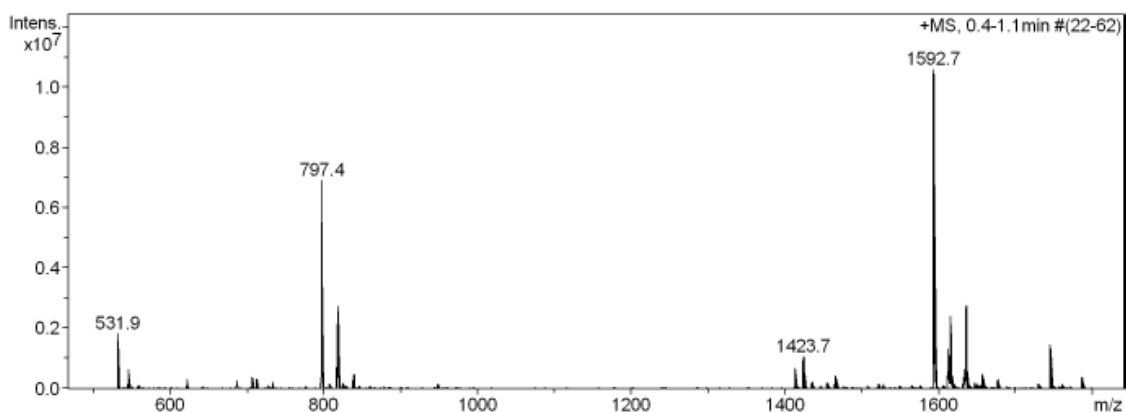

HPLC (220 nm)

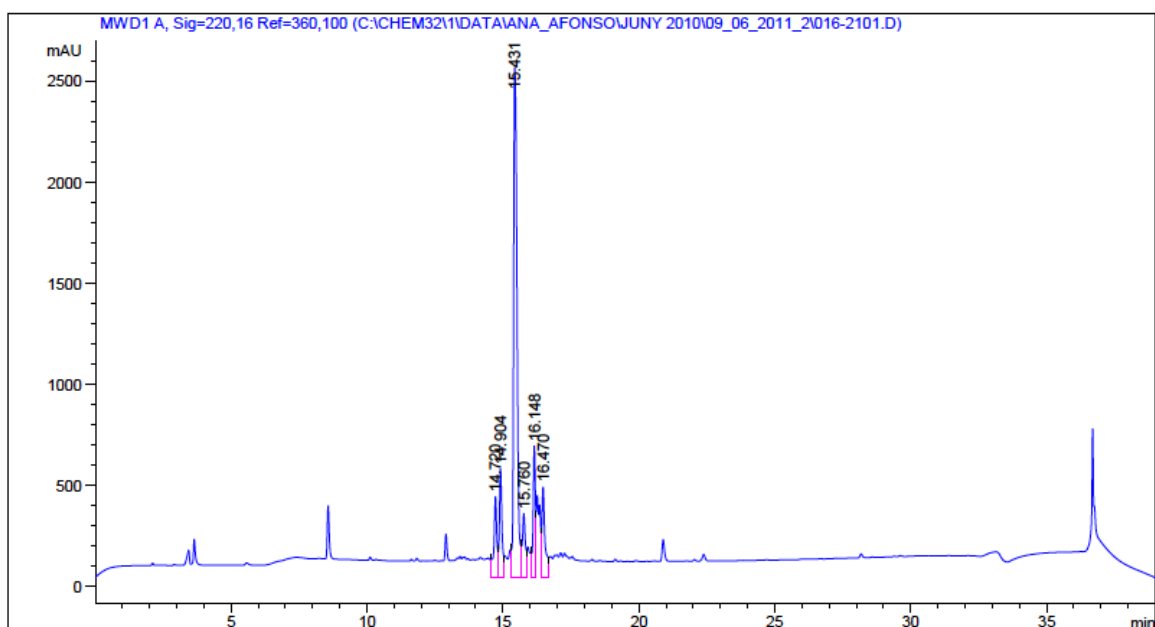

| Peak # | RetTime [min] | Type | Width [min] | Area [mAU*s] | Height [mAU] | Area %  |
|--------|---------------|------|-------------|--------------|--------------|---------|
| 1      | 14.720        | VV   | 0.1102      | 3174.79932   | 401.88586    | 8.1241  |
| 2      | 14.904        | VV   | 0.0970      | 3654.04932   | 539.89490    | 9.3505  |
| 3      | 15.431        | VV   | 0.1436      | 2.24210e4    | 2524.24414   | 57.3740 |
| 4      | 15.760        | VV   | 0.1052      | 2374.83667   | 317.90781    | 6.0771  |
| 5      | 16.148        | VV   | 0.0859      | 3801.68872   | 653.09937    | 9.7283  |
| 6      | 16.470        | VV   | 0.1129      | 3652.27295   | 448.86636    | 9.3460  |



## Fmoc-Lys-Lys-Leu-Lys-Lys(COC<sub>3</sub>H<sub>7</sub>)-Phe-Lys-Lys-Leu-Gln-OAll (11b)

ESI-MS (m/z)

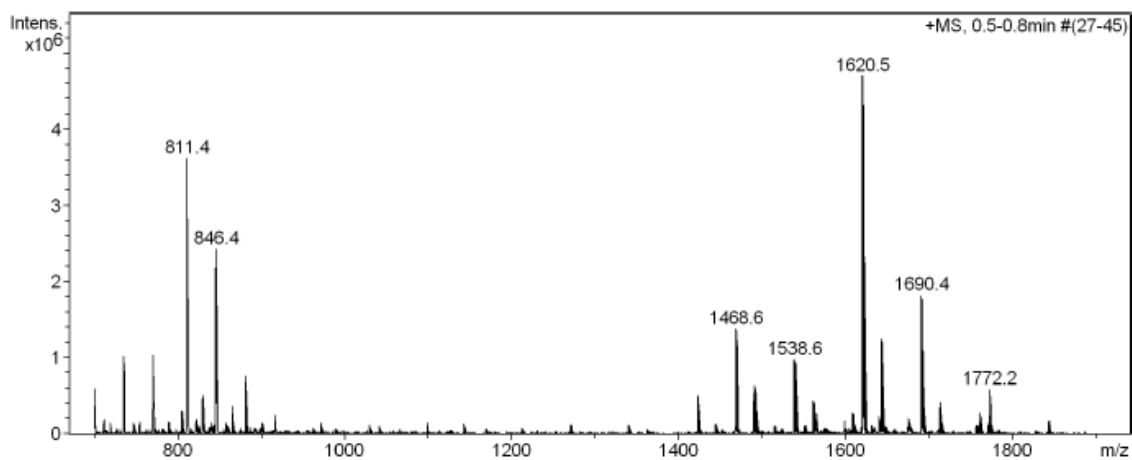

HPLC (220 nm)

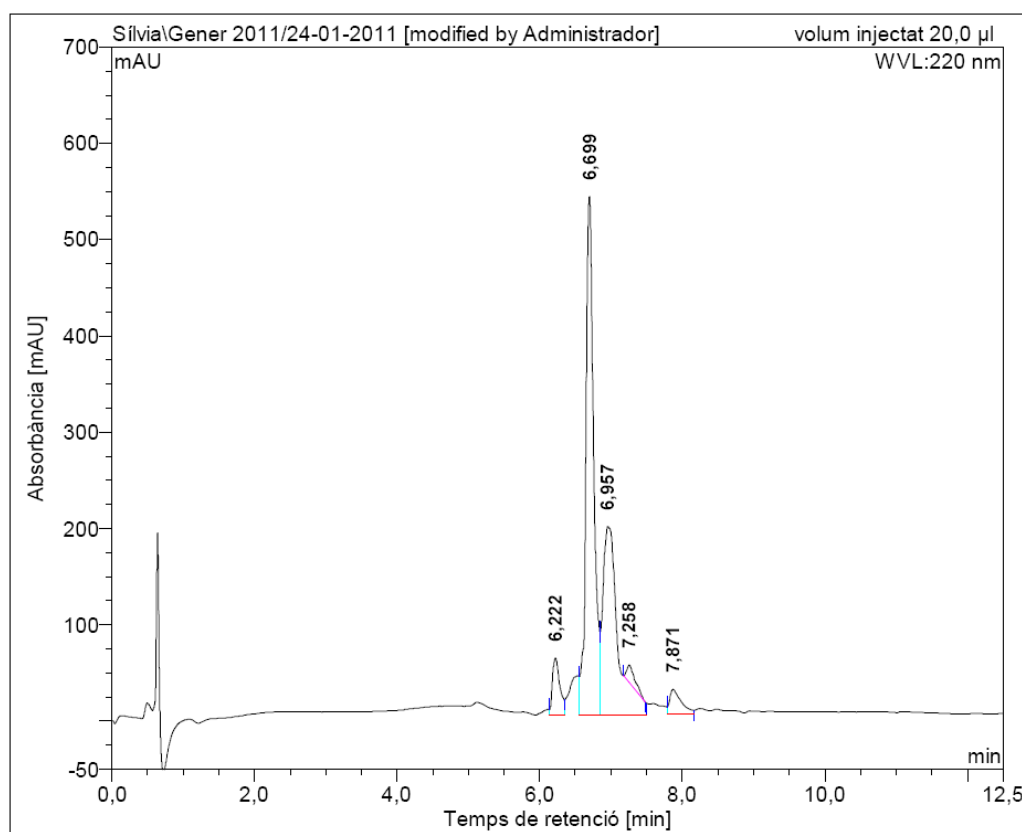

| No.    | mps retenc<br>min | alçada<br>mAU | Area<br>mAU*min | Area relativa<br>% |
|--------|-------------------|---------------|-----------------|--------------------|
| 1      | 6,22              | 58,358        | 7,085           | 5,35               |
| 2      | 6,70              | 537,527       | 69,007          | 52,12              |
| 3      | 6,96              | 195,224       | 49,002          | 37,01              |
| 4      | 7,26              | 18,335        | 2,539           | 1,92               |
| 5      | 7,87              | 25,249        | 4,762           | 3,60               |
| Total: |                   | 834,692       | 132,395         | 100,00             |

## Fmoc-Lys-Lys-Leu-Lys-Lys(COC<sub>7</sub>H<sub>15</sub>)-Phe-Lys-Lys-Leu-Gln-OAll (11c)

ESI-MS (m/z)

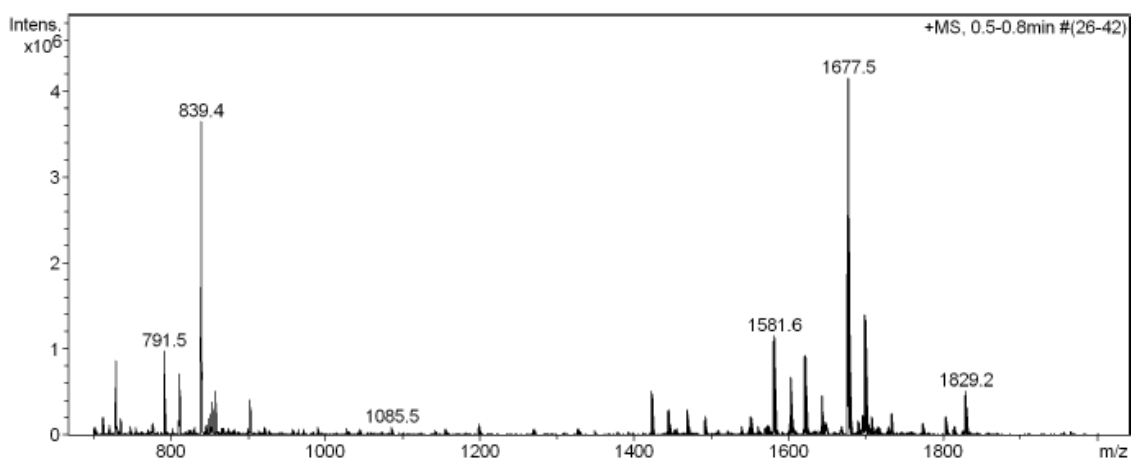

HPLC (220 nm)

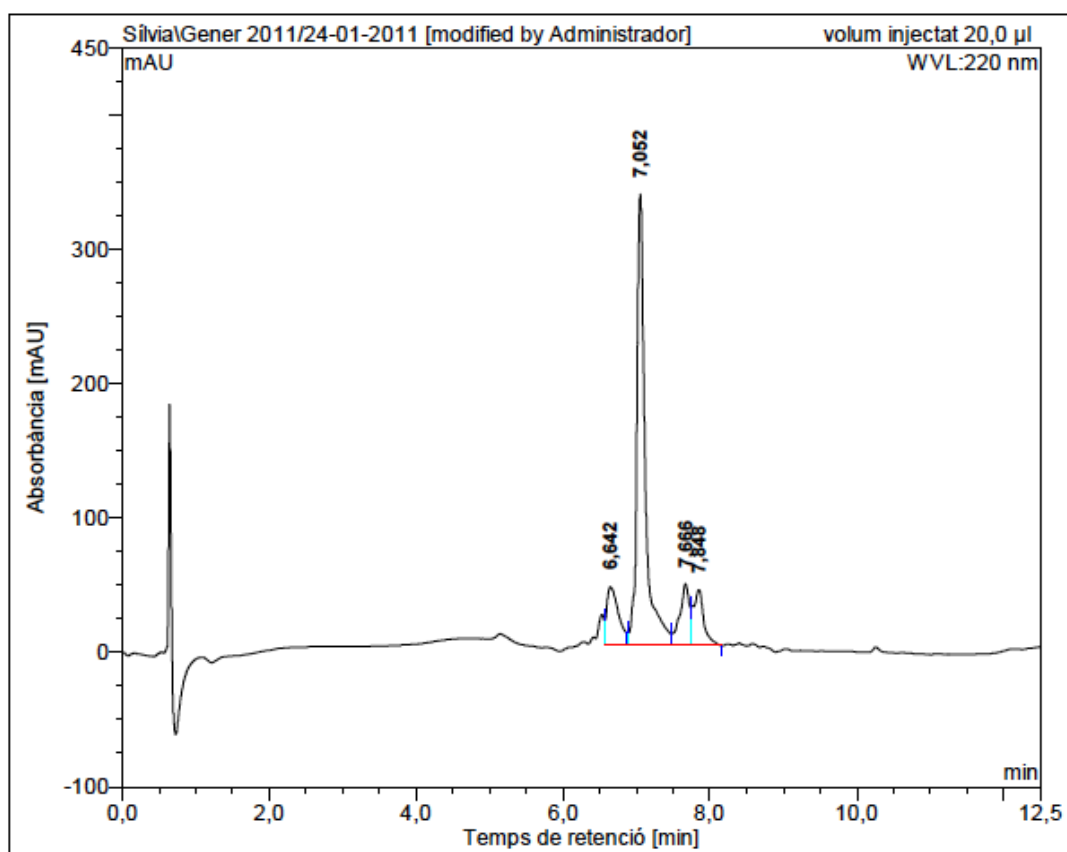

| No.    | mps retenc<br>min | alçada<br>mAU | Area<br>mAU*min | Area relativa<br>% |
|--------|-------------------|---------------|-----------------|--------------------|
| 1      | 6,64              | 43,326        | 7,995           | 12,01              |
| 2      | 7,05              | 335,685       | 44,668          | 67,09              |
| 3      | 7,67              | 46,050        | 6,733           | 10,11              |
| 4      | 7,85              | 41,628        | 7,189           | 10,80              |
| Total: |                   | 466,689       | 66,584          | 100,00             |

### c(Lys-Lys-Leu-Lys-Lys-Phe-Lys-Lys-Leu-Gln) (BPC194)

ESI-MS (m/z)

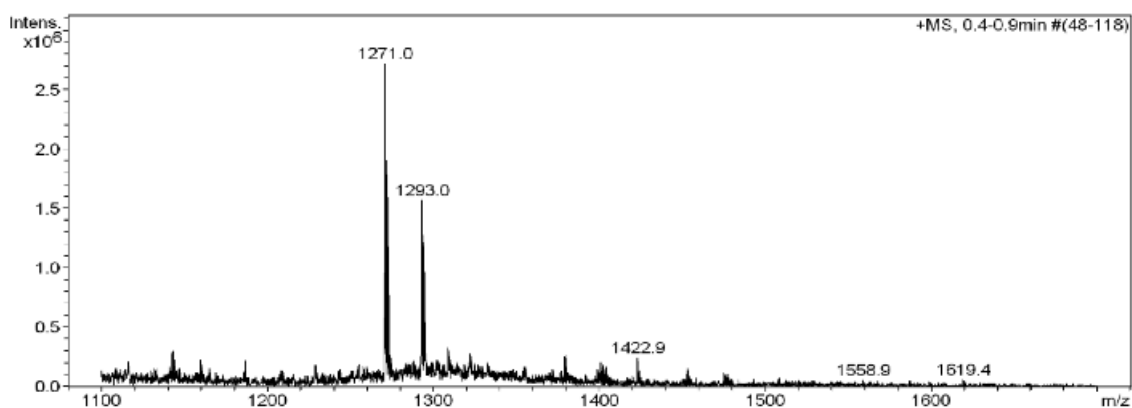

### c(Lys-Lys-Leu-Lys-Lys(ivDde)-Phe-Lys-Lys-Leu-Gln)

ESI-MS (m/z)

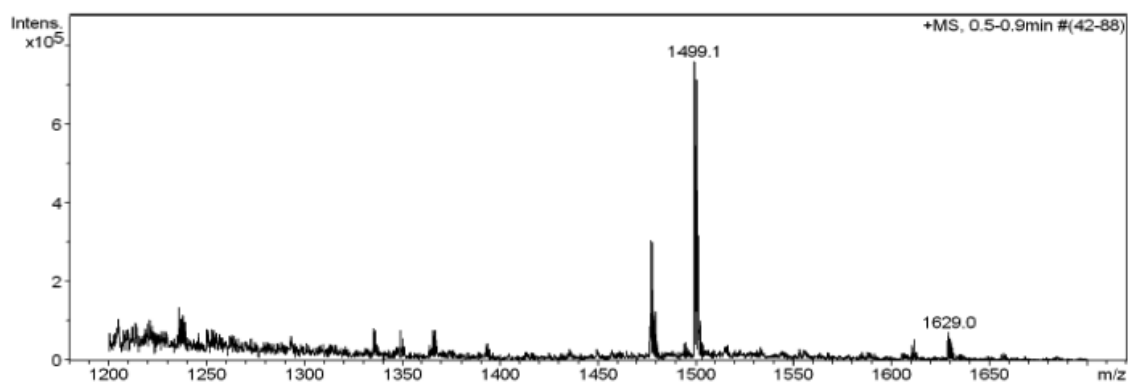

### c(Lys-Lys-Leu-Lys-Lys(COCH<sub>3</sub>)-Phe-Lys-Lys-Leu-Gln) (5)

ESI/MS (m/z)

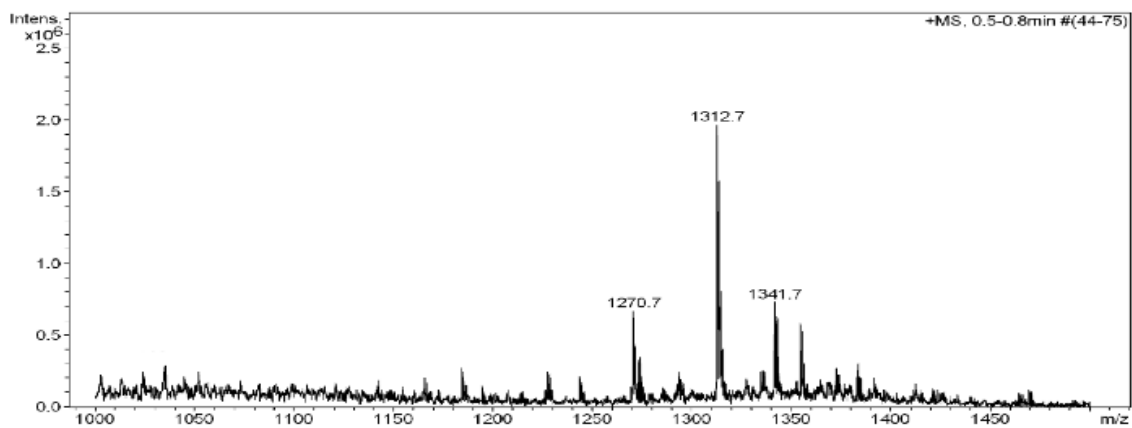

**c(Lys-Lys-Leu-Lys-Lys(COC<sub>7</sub>H<sub>15</sub>)-Phe-Lys-Lys-Leu-Gln) (BPC498)**

ESI-MS (m/z)

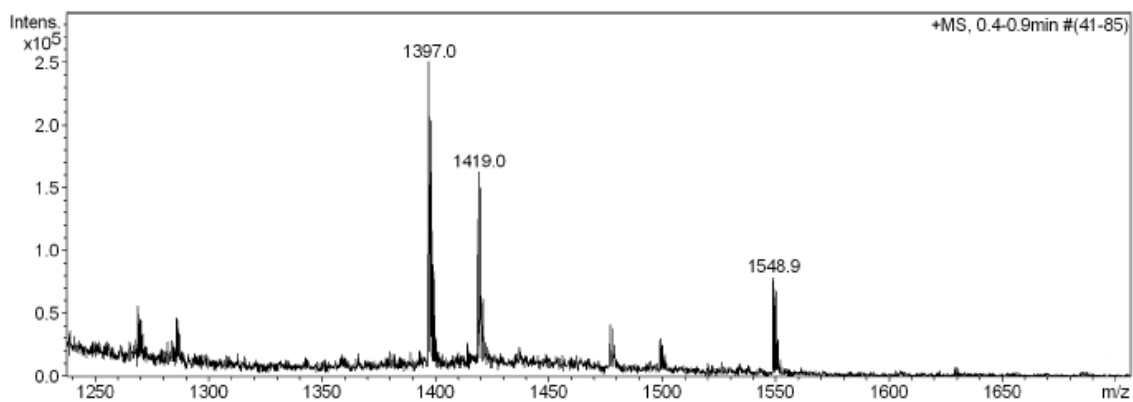

HRMS (ESI) m/z

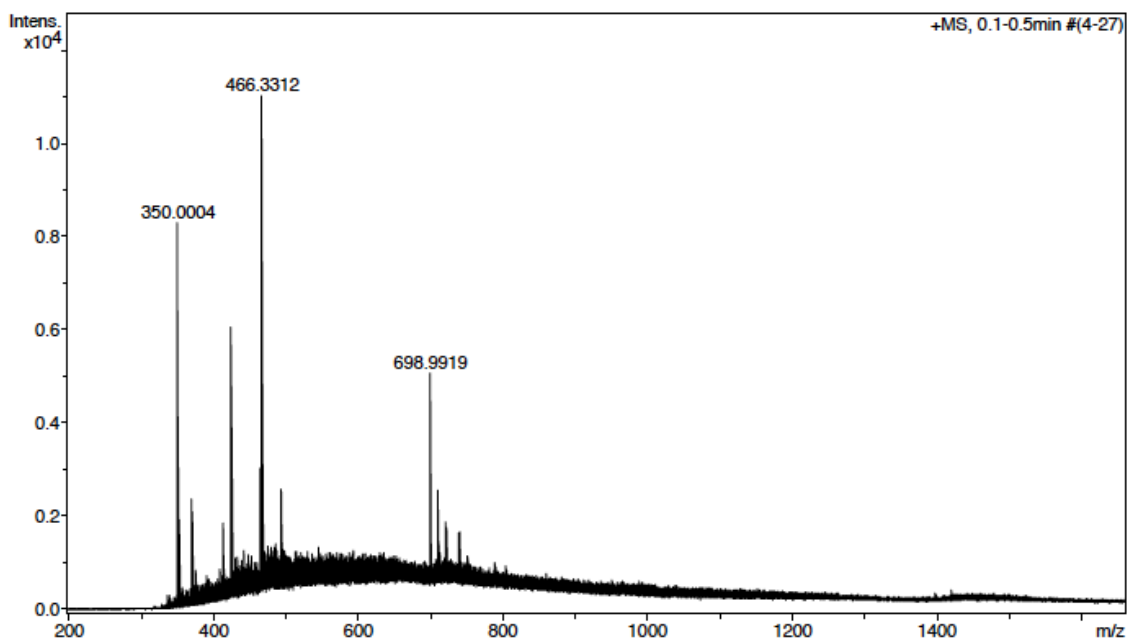

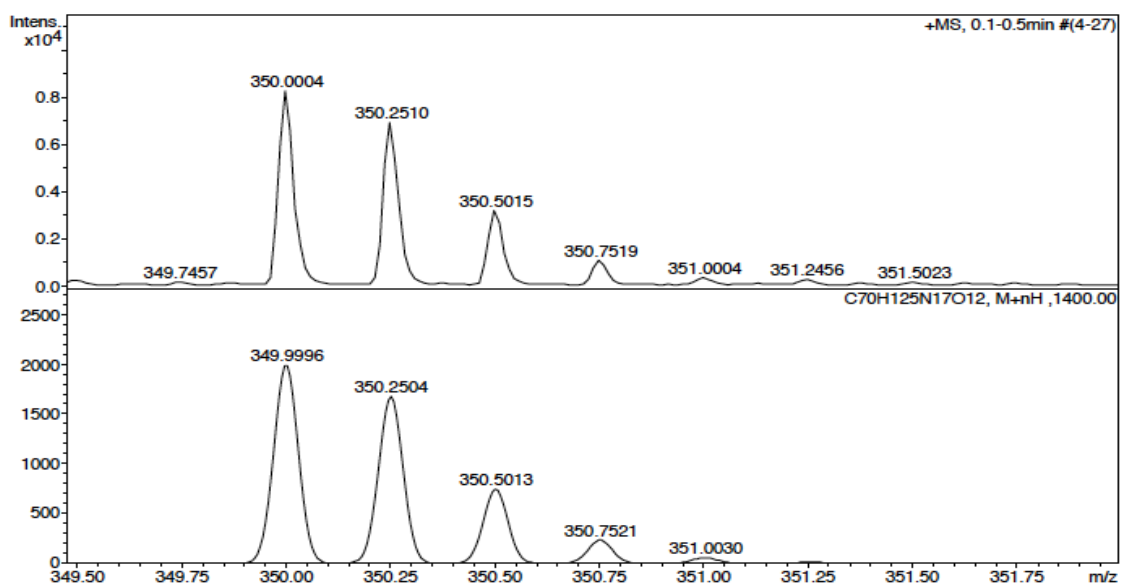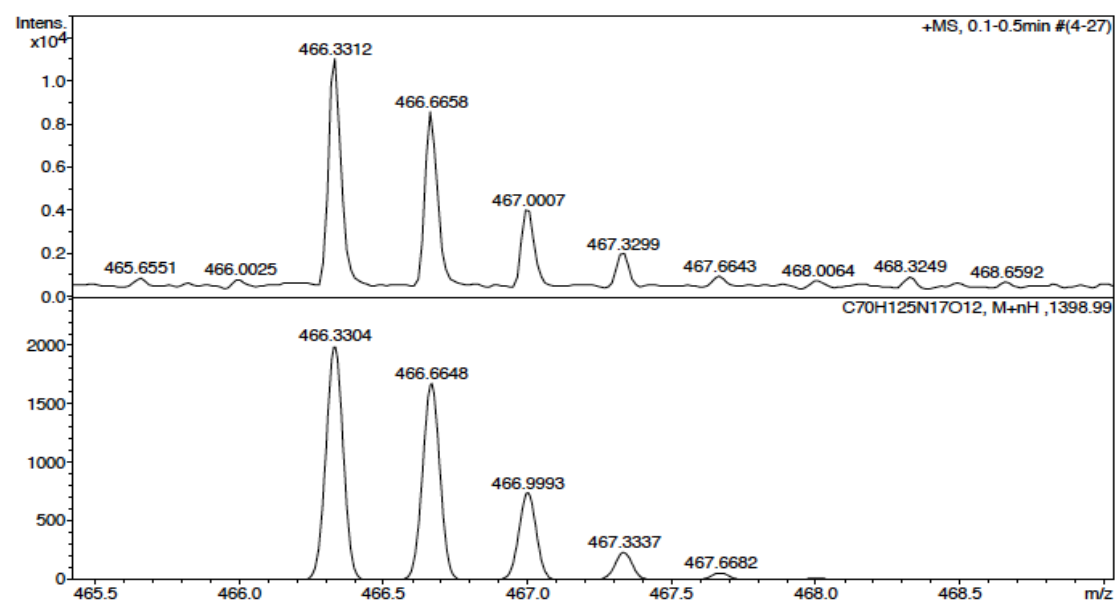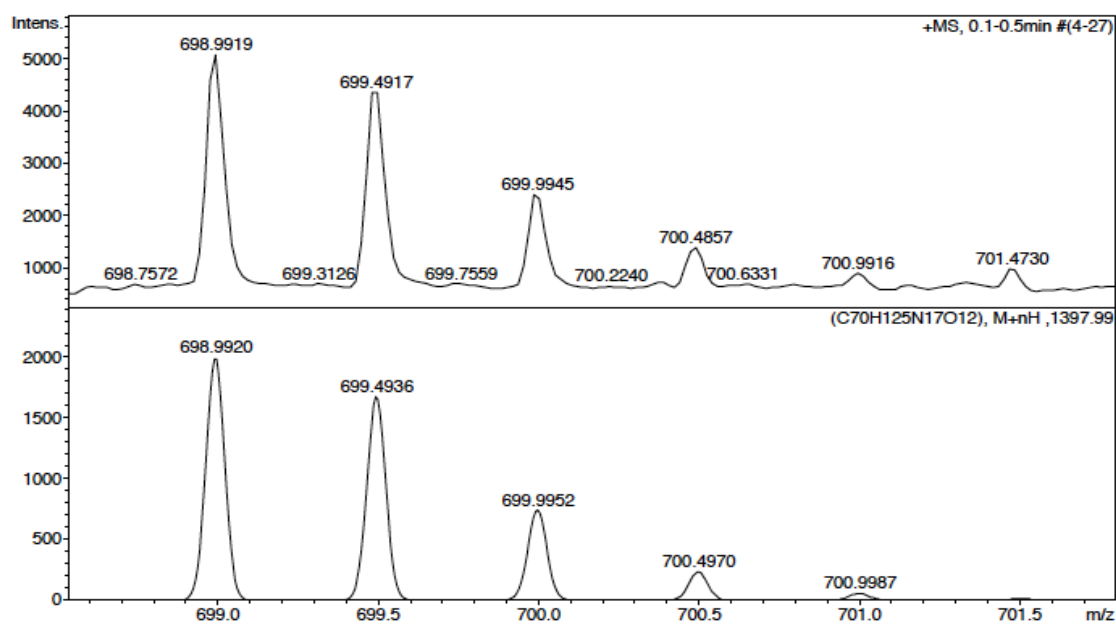

**c(Lys-Lys-Leu-Lys-Lys(COC<sub>4</sub>H<sub>7</sub>)-Phe-Lys-Lys-Leu-Gln) (BPC500)**

ESI-MS (m/z)

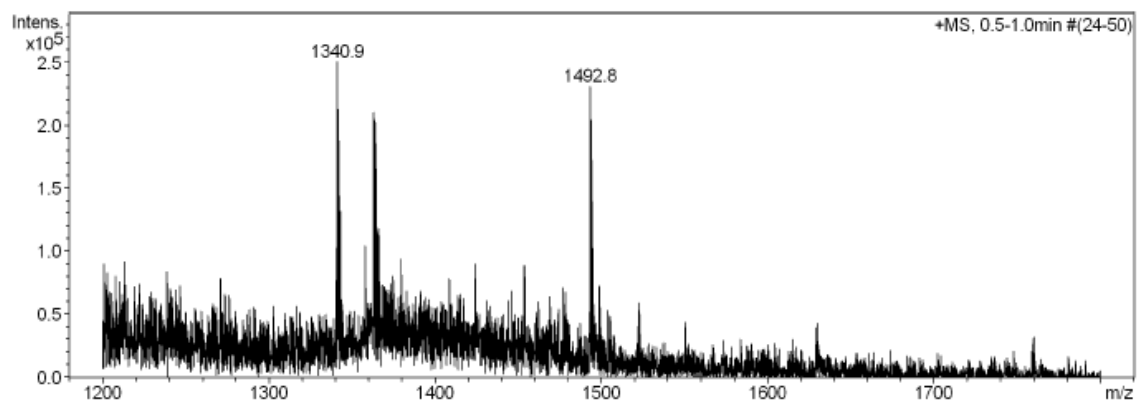

HRMS (ESI) m/z

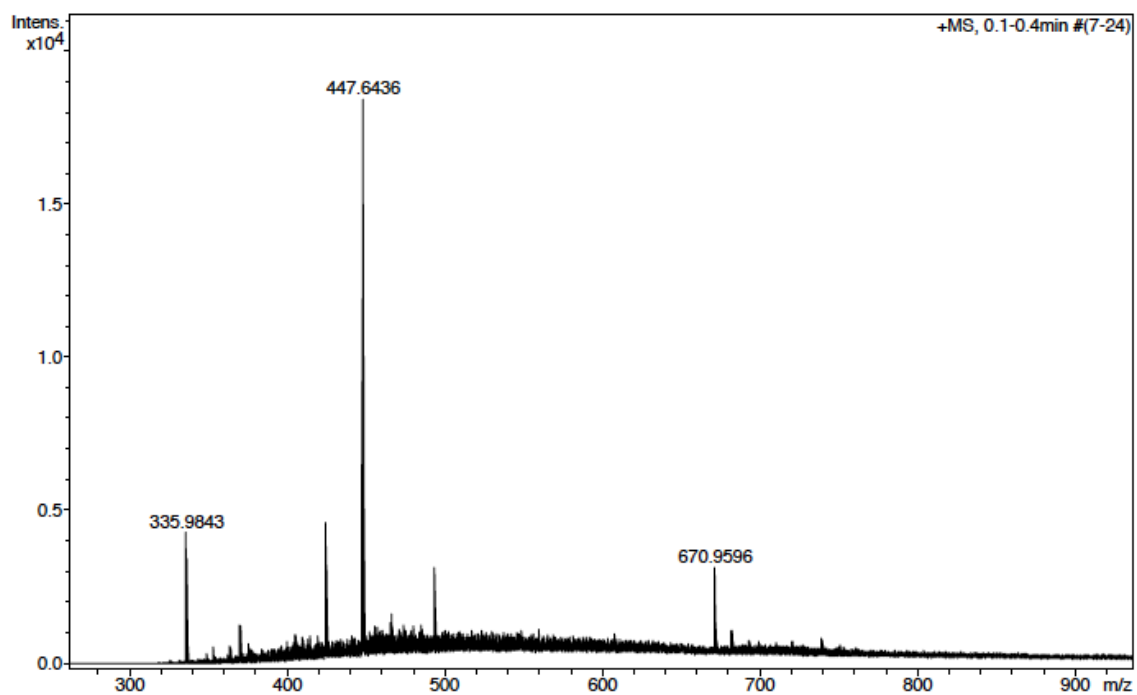

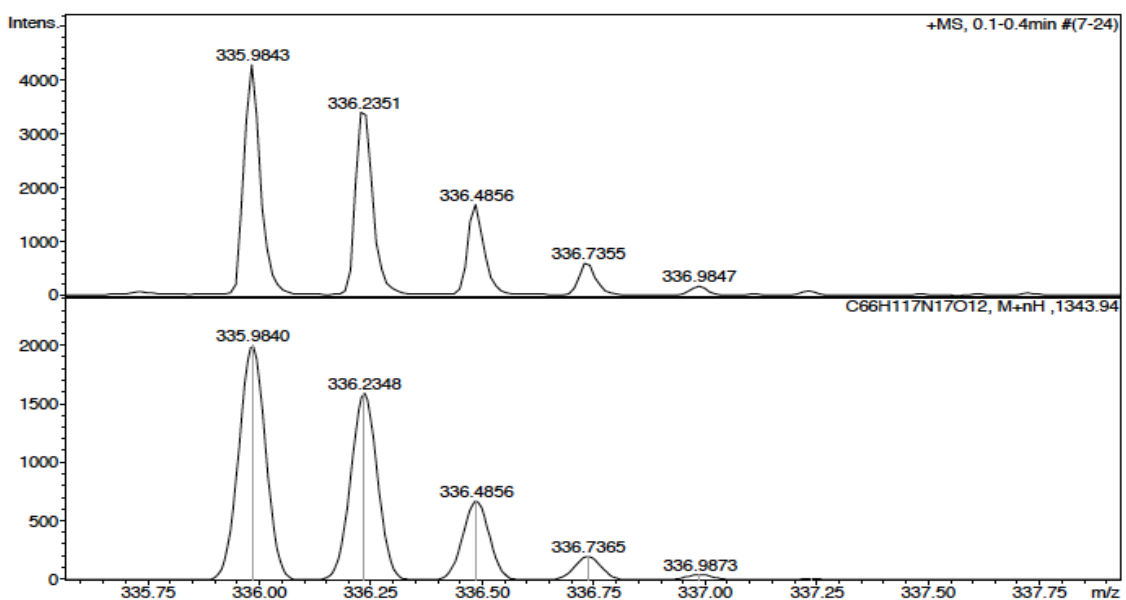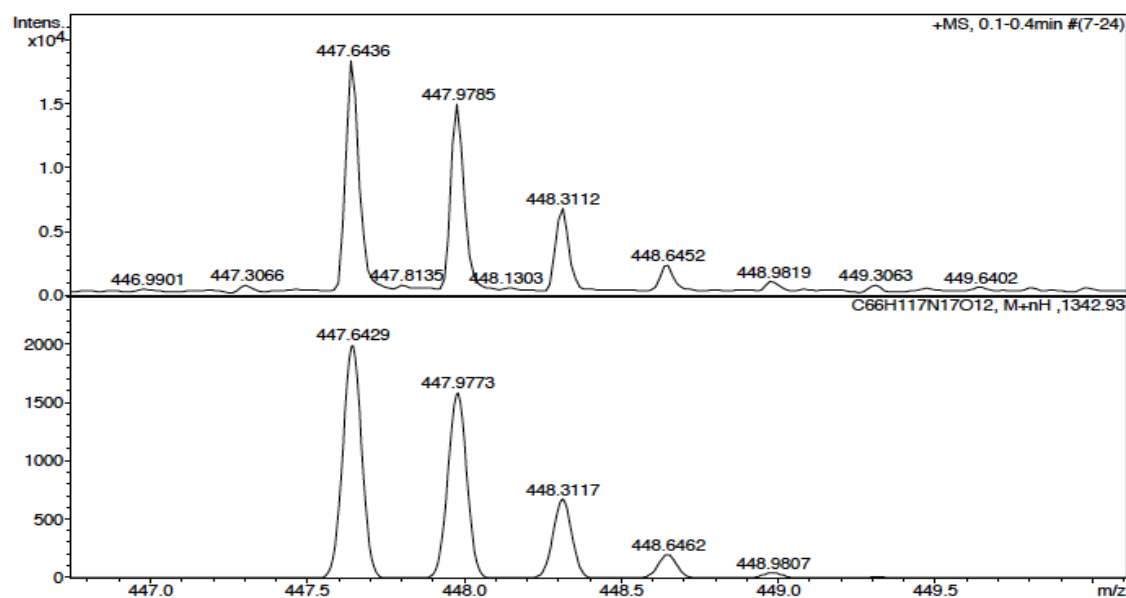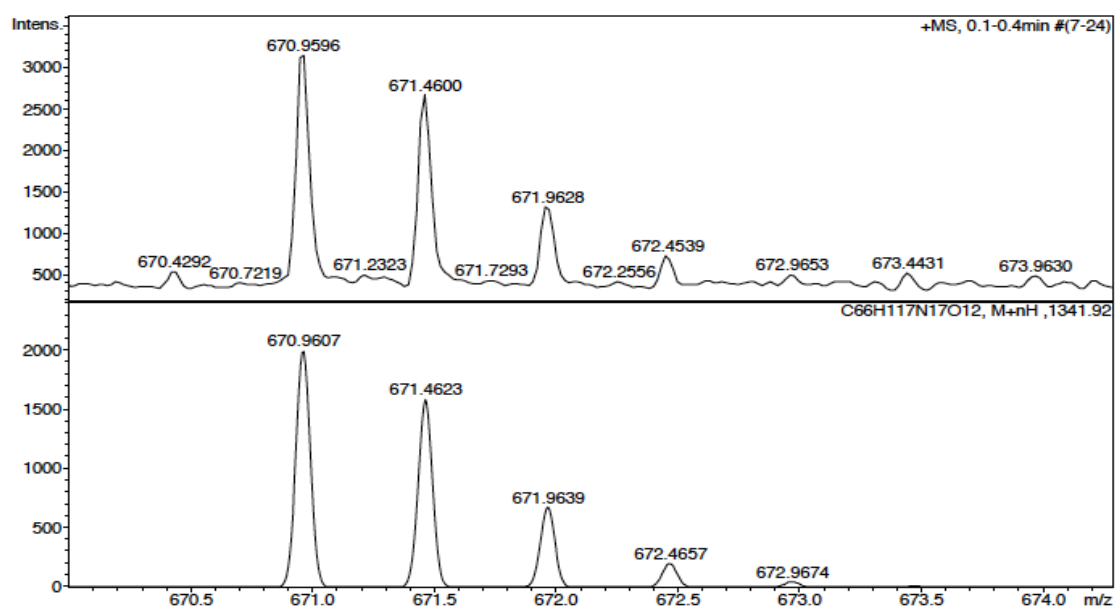

**c(Lys-Lys-Leu-Lys-Lys(COC<sub>15</sub>H<sub>31</sub>))-Phe-Lys-Lys-Leu-Gln) (BPC502)**

ESI-MS (m/z)

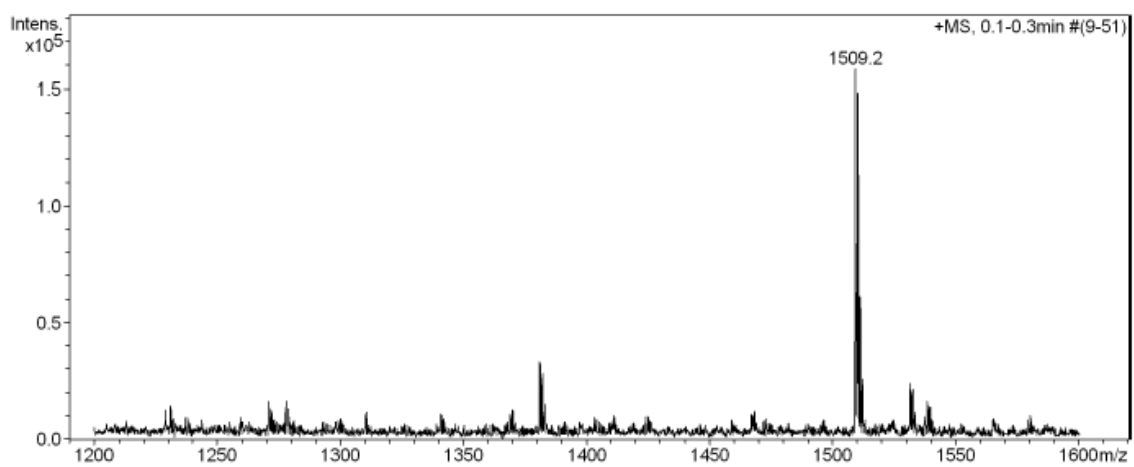

HRMS (ESI) m/z

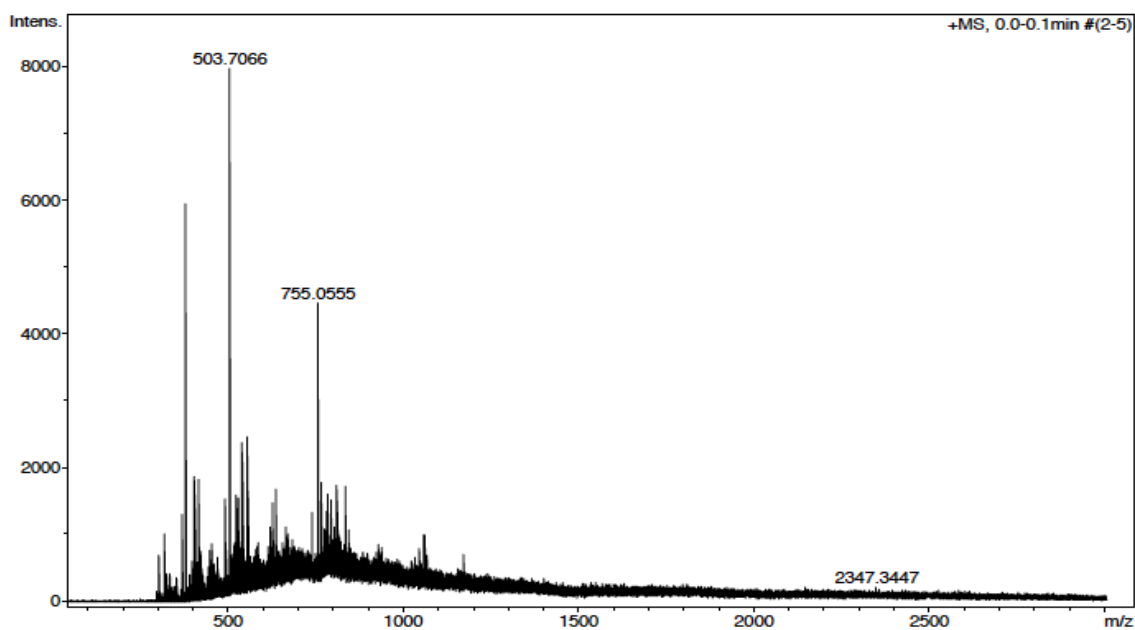



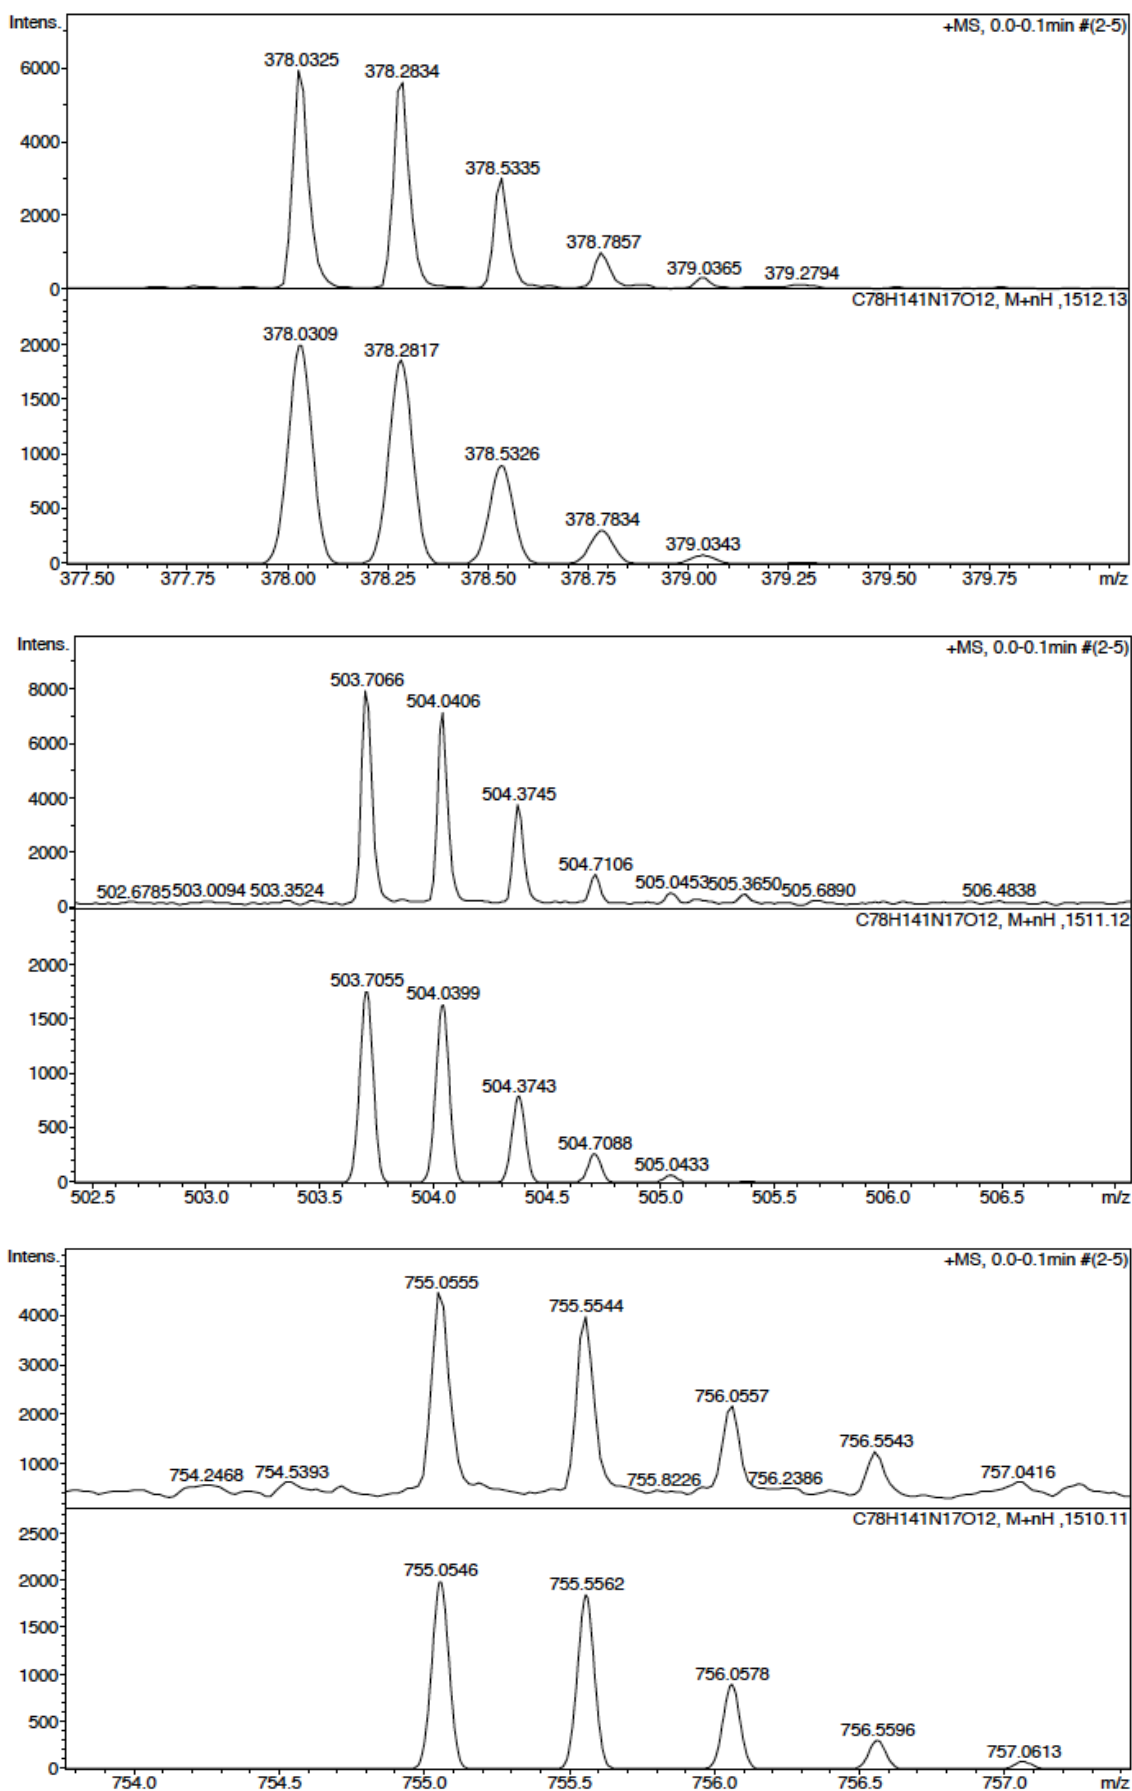

**c(Lys-Lys-Leu-Lys-Lys(COC<sub>11</sub>H<sub>22</sub>OH)-Phe-Lys-Lys-Leu-Gln) (BPC524)**

ESI-MS (m/z)

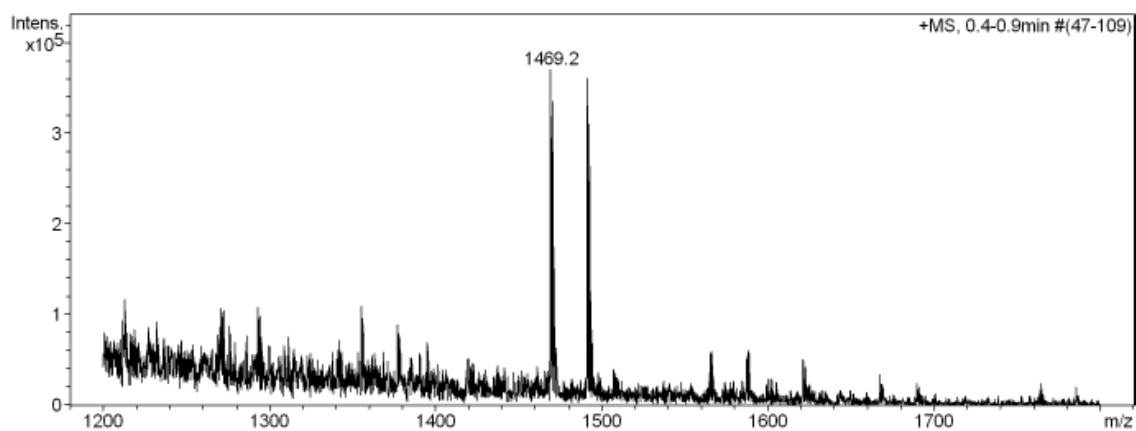

HRMS (ESI) m/z

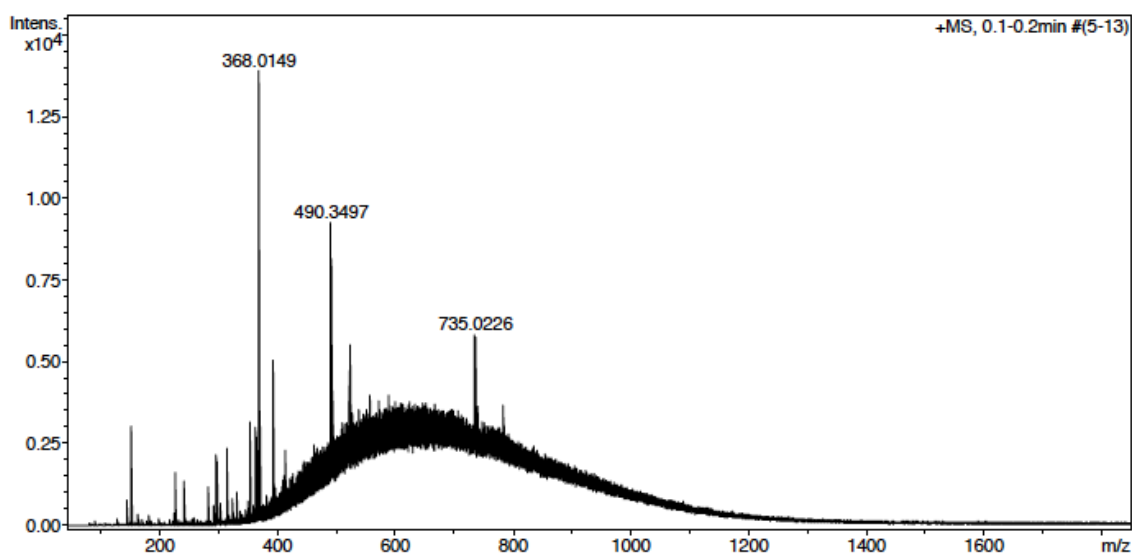

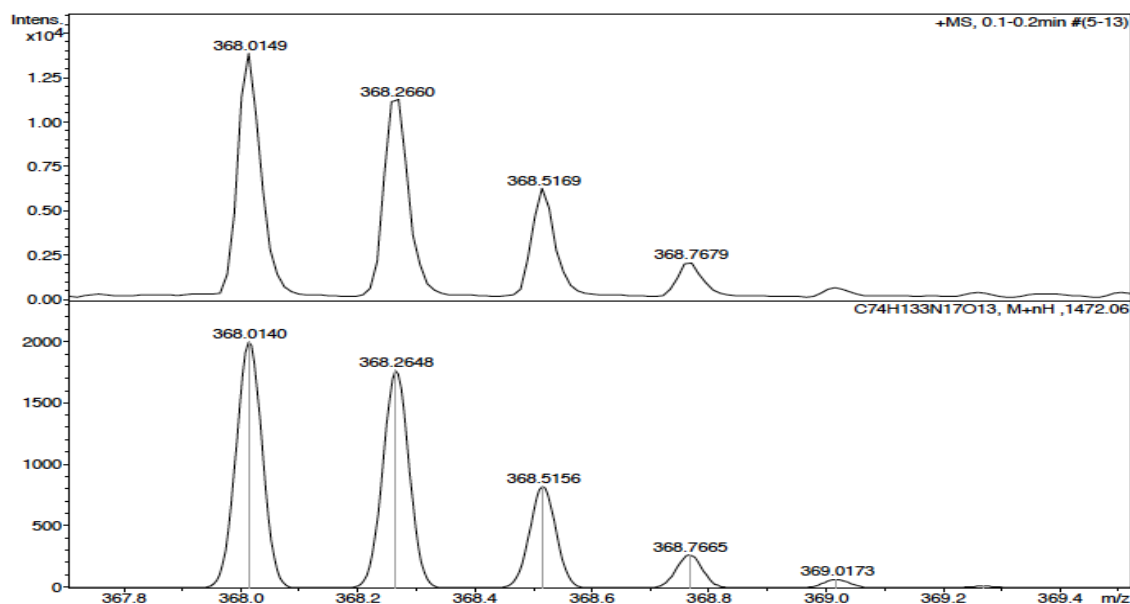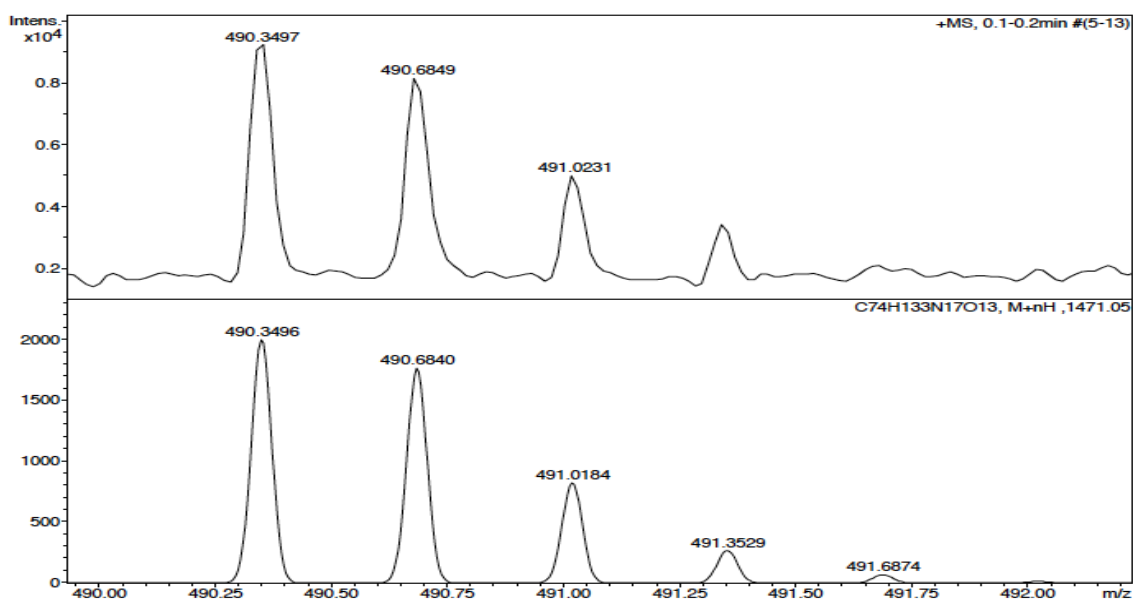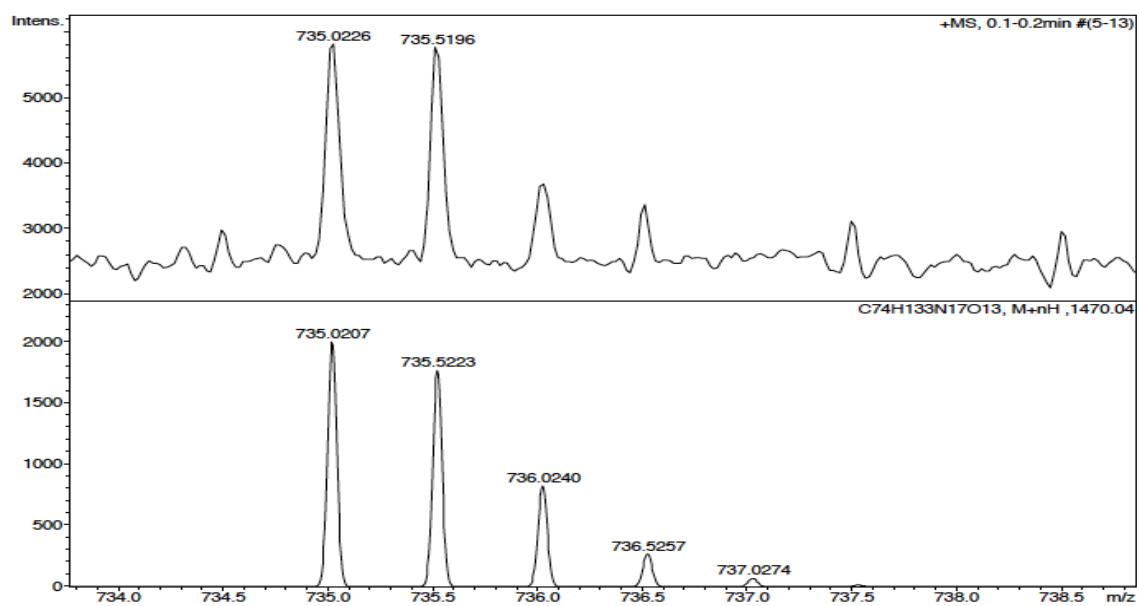

**c(Lys-Lys-Leu-Lys-Lys(COC<sub>11</sub>H<sub>23</sub>)-Phe-Lys-Lys-Leu-Gln) (BPC530)**

ESI-MS (m/z)

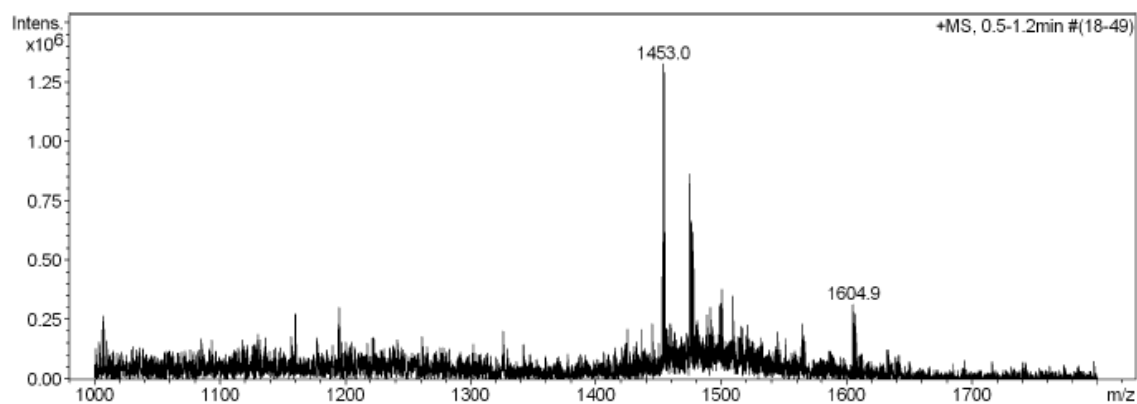

HRMS (ESI) m/z

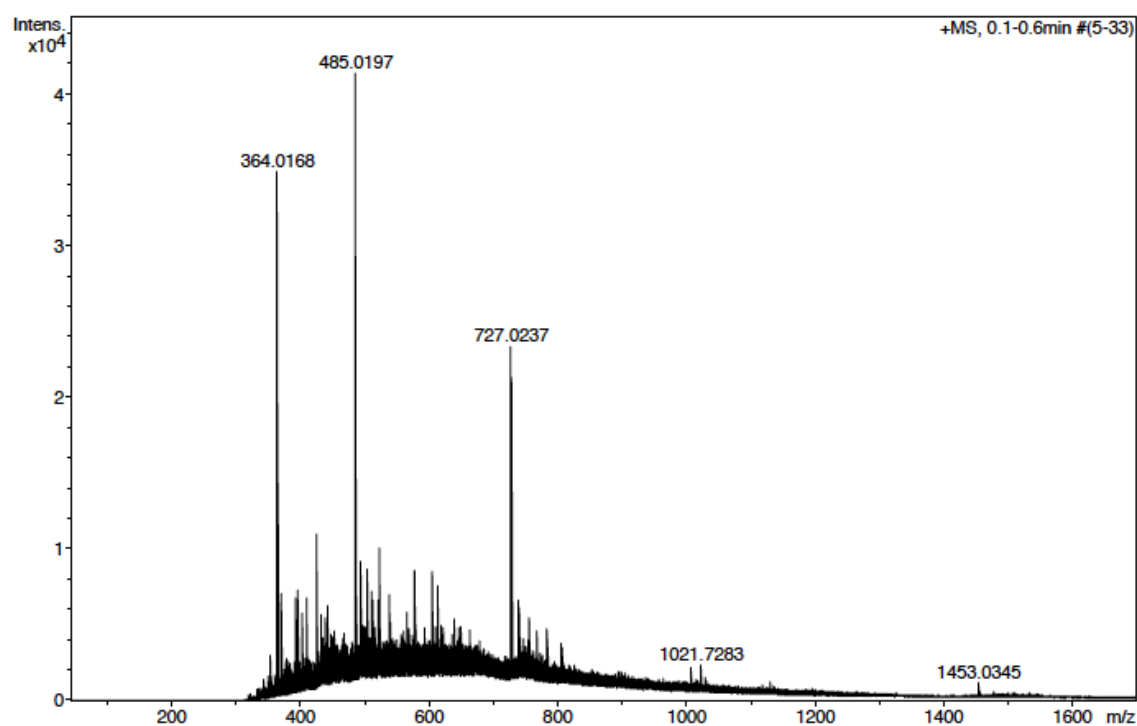

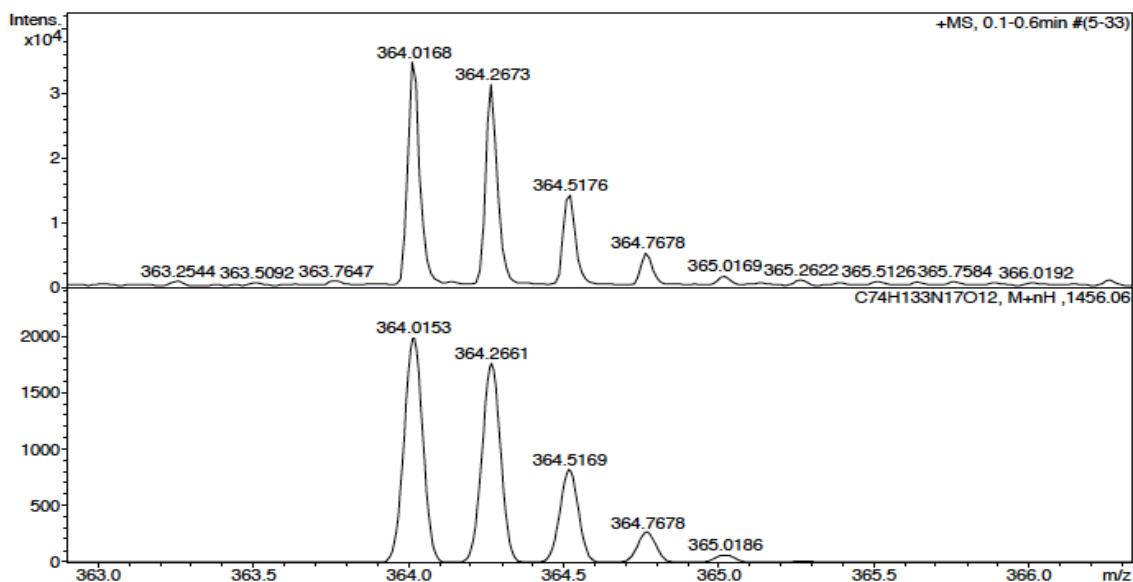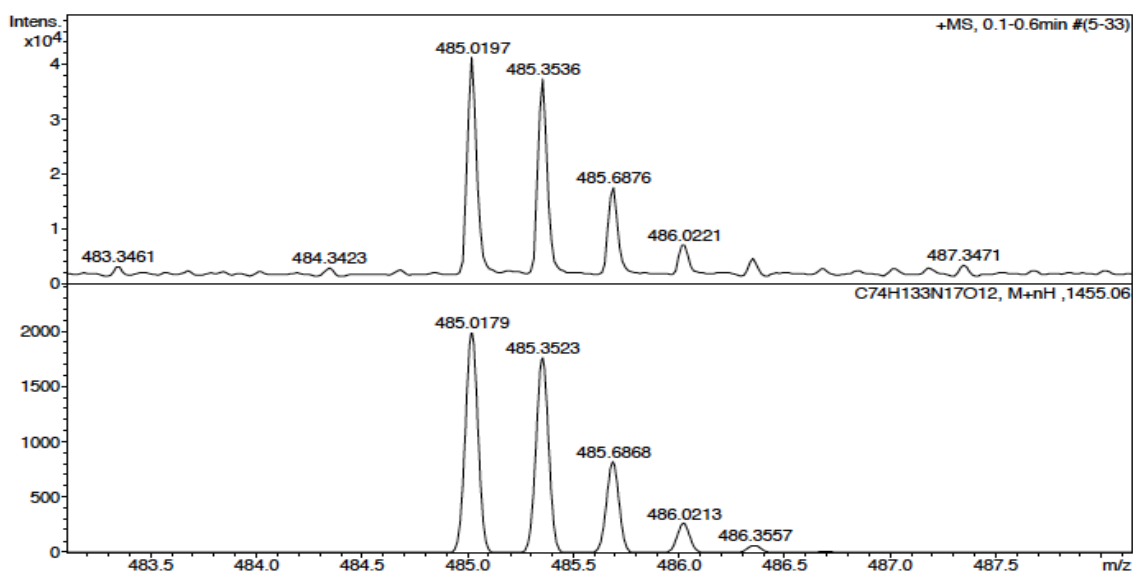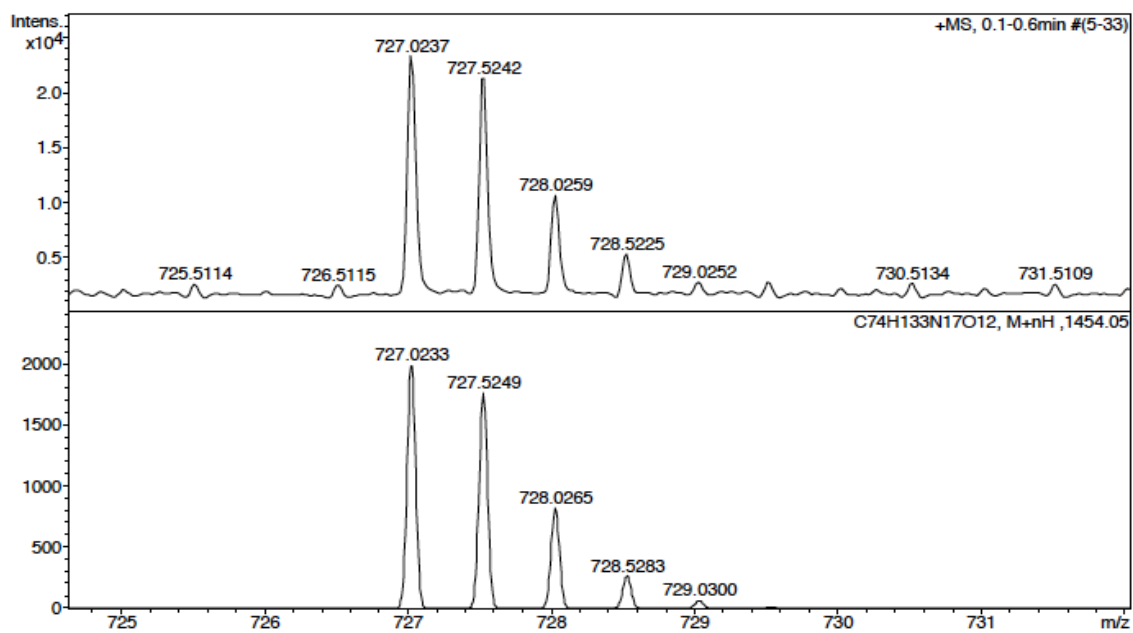

Supplement: c3ob40319j.pdf [file c3ob40319j.pdf]
